# Supplementary material
Source: MDPI journal article supplement (https://www.mdpi.com/2073-4441/13/11/1513)
Supplement: s1 [file s1]

# Supplementary Materials

The SWAT Calibration and Uncertainty Procedures (SWAT-CUP) developed by Abbaspour et al. [1] were used for parameter sensitivity analysis and model calibration of the KRB SWAT model. In this study, the sequential uncertainty fitting (SUFI2) algorithm was used. With global sensitivity analyses of 100 SWAT-CUP runs considering the Nash-Sutcliffe Efficiency (NSE) [2] as the objective function. Twenty-nine major runoff and flow parameters were selected in the KRB SWAT model sensitivity analyses. Parameter values after SWAT-CUP model calibration are listed in Table S1.

**Table S1. Major runoff and flow parameters in the KRB SWAT modelling**

| No | Parameter | Description                                                     | Best value |
|----|-----------|-----------------------------------------------------------------|------------|
| 1  | SFTMP     | Snowfall temperature (°C)                                       | -1.85      |
| 2  | SMTMP     | Snow melt base temperature (°C)                                 | 2.75       |
| 3  | SMFMX     | Maximum melt rate for snow during year (mm/°C/day)              | 5.70       |
| 4  | SMFMN     | Minimum melt rate for snow during the year (mm/°C/day)          | 2.75       |
| 5  | TIMP      | Snowpack temperature lag factor                                 | 0.05       |
| 6  | PLAPS     | Precipitation lapse rate (mm/km)                                | 7.10       |
| 7  | TLAPS     | Temperature lapse rate (°C/km)                                  | 6.25       |
| 8  | SNO_SUB   | Initial snow water content (mm)                                 | 20.0       |
| 9  | ALPHA_BF  | Baseflow alpha-factor (days)                                    | 0.35       |
| 10 | GW_DELAY  | Groundwater delay (days)                                        | 265        |
| 11 | GWQMN     | Threshold depth of water required for return flow to occur (mm) | 3050       |
| 12 | REVAPMN   | Threshold depth of water for "revap" to occur (mm)              | 450        |
| 13 | GW_REVAP  | Groundwater "revap" coefficient                                 | 0.10       |
| 14 | RCHRG_DP  | Deep aquifer percolation fraction                               | 0.05       |
| 15 | SOL_Z     | Depth from soil surface to bottom of layer (mm)                 | -0.05*     |
| 16 | SOL_BD    | Moist bulk density (m <sup>3</sup> /m <sup>3</sup> )            | 0.10*      |
| 17 | SOL_AWC   | Available water capacity of the soil layer (mm)                 | 0.03*      |
| 18 | SOL_K     | Saturated hydraulic conductivity (mm/hr)                        | 0.06*      |
| 19 | SOL_ALB   | Moist soil albedo                                               | 0.15*      |
| 20 | SOL_CRK   | Crack volume potential of soil                                  | 0.05       |
| 21 | CANMX     | Maximum canopy storage (mm)                                     | 9.65*      |
| 22 | ESCO      | Soil evaporation compensation factor                            | 0.75       |
| 23 | EPCO      | Plant uptake compensation factor                                | 0.65       |
| 24 | SURLAG    | Surface runoff lag time (days)                                  | 2.50       |
| 25 | OV_N      | Manning's "n" value for overland flow                           | -0.10*     |
| 26 | SLSUBBSN  | Average slope length (m)                                        | -0.05*     |
| 27 | CN2       | SCS runoff curve number                                         | -0.11*     |
| 28 | CH_N2     | Manning's "n" value for the main channel                        | 0.055      |
| 29 | CH_K2     | Effective hydraulic conductivity in the main channel (mm/hr)    | 15.5       |

Figure S1 shows a good match between the observed and simulated daily Kabul River flows at the Nowshera station "near Motorway-1 Bridge" from 2008 to 2014 over the calibration period with bias of 3.4%, NSE of 0.74, and  $R^2$  of 0.80.

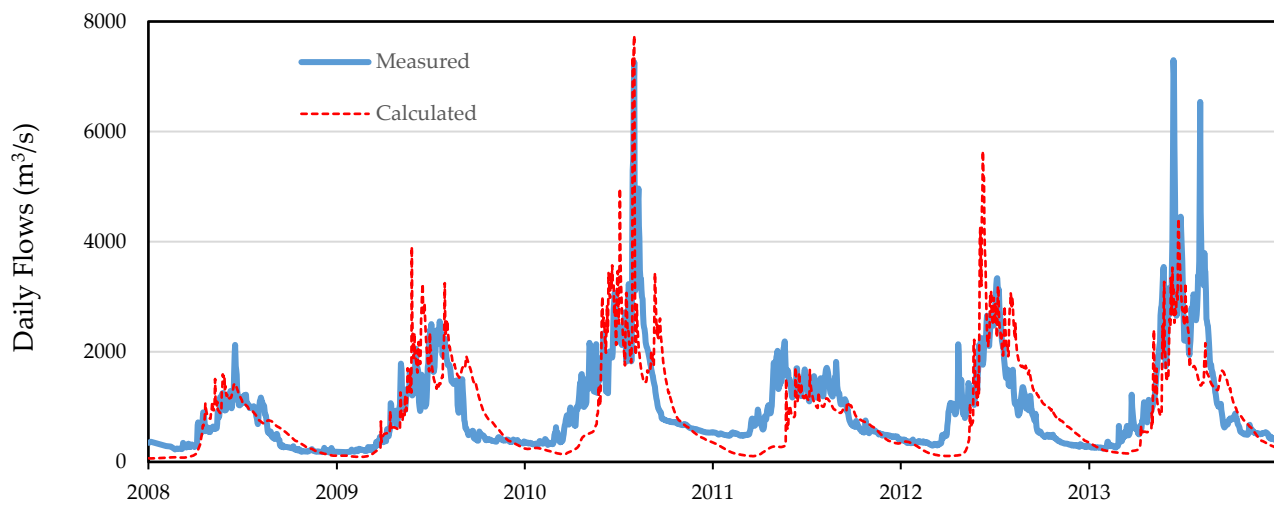

**Figure S1.** Measured and SWAT model calculated daily Kabul River flows at the Nowshera station

### **HEC-RAS Model for Flood Innundation Mapping**

In this study, Hydrologic Engineering Center (HEC) River Analysis System (RAS) was used to develop the flood innundation maps under different historic and future climate scenarios with and without the proposed dams. HEC-RAS was developed by the United States Army Corps of Engineers [3]. The urban area of Nowshera was chosen as case study to determine the flood flow impacts. The HEC-RAS model was calibrated using the 2010 flood event in Nowshera based on the observed water level and satellite-based flood innundation imagery. The main calibration parameters in the HEC-RAS model, include the Manning's Roughness Coefficient and the river channel geometry and slope (obtained from the Digital levelation Maps). Manning's Roughness Coefficient values used in this research for different Kabul River zones were 0.04 and 0.15 for the main channel and the flood plains [4].

### **References**

1. Abbaspour, K.C., Johnson, C.A. and Van Genuchten, M.T., 2004. Estimating uncertain flow and transport prameters using a sequential uncertainty fitting procedure. *Vadose Zone Journal*, 3(4), pp.1340-1352.
2. Nash, J. E., & Sutcliffe, J. V. (1970). River flow forecasting through conceptual models part I—A discussion of principles. *Journal of hydrology*, 10(3), 282-290.
3. Yuan, Y., & Qaiser, K. (2011). *Floodplain modeling in the Kansas river basin using hydrologic engineering center (HEC) models: impacts of urbanization and wetlands for mitigation*. US Environmental Protection Agency, Office of Research and Development.
4. Khattak, M. S., Anwar, F., Saeed, T. U., Sharif, M., Sheraz, K., & Ahmed, A. (2016). Floodplain mapping using HEC-RAS and ArcGIS: A case study of Kabul River. *Arabian Journal for Science and Engineering*, 41(4), 1375-1390.
